# Supplementary material for: Impact and mechanism of sulphur-deficiency on modern wheat farming nitrogen-related sustainability and gliadin content
Source: PubMed Central journal article supplement (PMC8346565; doi:10.1038/s42003-021-02458-7), 2021-08-06
Supplement: 42003_2021_2458_MOESM3_ESM.pdf [file 42003_2021_2458_MOESM3_ESM.pdf]

|            | Field trial |               |             |
|------------|-------------|---------------|-------------|
|            | Grain yield | Protein yield | Grain yield |
| S30 vs S0  | 0.0077      | 0.0017        | 0.0034      |
| S50 vs S0  | 0.0000      | 0.0000        | 0.0000      |
| S50 vs S30 | 0.3180      | 0.1394        | 0.0015      |

Note: *P* values of multiple pairwise T-test on each agronomic trait and gluten comp

|     | Field trial                      |                                    |                     |
|-----|----------------------------------|------------------------------------|---------------------|
|     | Grain yield (kg/m <sup>2</sup> ) | Protein yield (kg/m <sup>2</sup> ) | Grain yield (g/pot) |
| S0  | 0.22                             | 0.019                              | 1.21                |
| S30 | 0.25**                           | 0.023**                            | 2.12**              |
| S50 | 0.26***                          | 0.024***                           | 3.25***             |

Note: Mean values are marked with statistical significance of S30 and S50 in compa

*P* < 0.05     \*

*P* < 0.01     \*\*

*P* < 0.001    \*\*\*

ns             not significant

Agronomic trait

|                            | Glasshouse experiment        |
|----------------------------|------------------------------|
| Neck to card (Wyalkatchem) | Straw diameter (Wyalkatchem) |
| 0.6030                     | 0.0023                       |
| 0.0364                     | 0.0068                       |
| 0.0184                     | 0.3006                       |

ponents among three sulphur treatments in the 2014 field trial and 2014 glasshou

Agronomic trait

|                                | Glasshouse experiment            |
|--------------------------------|----------------------------------|
| Neck to card (mm, Wyalkatchem) | Straw diameter (mm, Wyalkatchem) |
| 3.74                           | 1.63                             |
| 4.26 <sup>ns</sup>             | 1.91**                           |
| 7.45*                          | 2.00**                           |

arison with S0 on each agronomic trait and gluten component in the 2014 field tri

| Keycard diameter (Wyalkatchem) | Head weight (Spitfire) | glu/gli | gliadins% |
|--------------------------------|------------------------|---------|-----------|
| 0.0007                         | 0.0012                 | 0.0000  | 0.0000    |
| 0.0000                         | 0.0005                 | 0.0002  | 0.0003    |
| 0.6779                         | 0.2912                 | 0.0002  | 0.0001    |

use experiment.

| Keycard diameter (mm, Wyalkatchem) | Head weight (g, Spitfire)) | glu/gli | gliadins (%) |
|------------------------------------|----------------------------|---------|--------------|
| 1.50                               | 1.09                       | 0.34    | 75.18        |
| 1.95***                            | 1.44**                     | 0.68*** | 59.90***     |
| 1.98***                            | 1.48***                    | 0.46*** | 68.36***     |

al and the 2014 glasshouse experiment.

| Field trial          |                        |                     |                           | Gluten composition  |         |
|----------------------|------------------------|---------------------|---------------------------|---------------------|---------|
| $\omega$ 5-gliadins% | $\omega$ 1,2-gliadins% | $\omega$ -gliadins% | $\alpha/\beta$ -gliadins% | $\gamma$ -gliadins% | glu/gli |
| 0.0001               | 0.0001                 | 0.0000              | 0.0000                    | 0.0000              | 0.0001  |
| 0.0000               | 0.0764                 | 0.0204              | 0.2386                    | 0.0001              | 0.0073  |
| 0.0000               | 0.0000                 | 0.0041              | 0.0001                    | 0.0703              | 0.3247  |

| Field trial             |                           |                        |                              | Gluten composition     |         |
|-------------------------|---------------------------|------------------------|------------------------------|------------------------|---------|
| $\omega$ 5-gliadins (%) | $\omega$ 1,2-gliadins (%) | $\omega$ -gliadins (%) | $\alpha/\beta$ -gliadins (%) | $\gamma$ -gliadins (%) | glu/gli |
| 2.57                    | 4.74                      | 7.31                   | 34.68                        | 33.19                  | 0.59    |
| 1.69***                 | 3.62***                   | 5.32***                | 27.20***                     | 27.38***               | 1.06*** |
| 0.87***                 | 5.43 <sup>ns</sup>        | 6.30*                  | 33.33 <sup>ns</sup>          | 28.74***               | 0.93**  |

| Glasshouse experiment |                      |                        |                     |                           |                     |
|-----------------------|----------------------|------------------------|---------------------|---------------------------|---------------------|
| gliadins%             | $\omega$ 5-gliadins% | $\omega$ 1,2-gliadins% | $\omega$ -gliadins% | $\alpha/\beta$ -gliadins% | $\gamma$ -gliadins% |
| 0.0000                | 0.0068               | 0.0003                 | 0.0001              | 0.0005                    | 0.0025              |
| 0.0040                | 0.0098               | 0.0063                 | 0.7018              | 0.0001                    | 0.1565              |
| 0.2837                | 0.0001               | 0.0635                 | 0.0004              | 0.9274                    | 0.3511              |

| Glasshouse experiment |                         |                           |                        |                              |                        |
|-----------------------|-------------------------|---------------------------|------------------------|------------------------------|------------------------|
| gliadins (%)          | $\omega$ 5-gliadins (%) | $\omega$ 1,2-gliadins (%) | $\omega$ -gliadins (%) | $\alpha/\beta$ -gliadins (%) | $\gamma$ -gliadins (%) |
| 63.02                 | 1.39                    | 3.34                      | 4.73                   | 31.04                        | 27.25                  |
| 48.79***              | 0.96**                  | 2.20***                   | 3.16***                | 24.15***                     | 21.48**                |
| 52.42**               | 1.99**                  | 2.62**                    | 4.61 <sup>ns</sup>     | 24.03***                     | 23.77 <sup>ns</sup>    |

| Field_trial |        |        |                | GrainYield_(kg/m2) | ProtYield_(kg/m2) | NUE_GY   |
|-------------|--------|--------|----------------|--------------------|-------------------|----------|
| Varname     | Streat | Ntreat | range          |                    |                   |          |
| Wyalkatchem | S0     | N25    | smallest_value | 0.2258             | 0.0198            | 90.3325  |
|             |        |        | largest_value  | 0.2276             | 0.0208            | 91.0260  |
| Westonia    | S0     | N25    | smallest_value | 0.1895             | 0.0166            | 75.8156  |
|             |        |        | largest_value  | 0.2404             | 0.0217            | 96.1792  |
| Livingston  | S0     | N25    | smallest_value | 0.1853             | 0.0162            | 74.1143  |
|             |        |        | largest_value  | 0.2211             | 0.0199            | 88.4312  |
| Mace        | S0     | N25    | smallest_value | 0.2205             | 0.0185            | 88.1870  |
|             |        |        | largest_value  | 0.2499             | 0.0219            | 99.9455  |
| Wyalkatchem | S30    | N25    | smallest_value | 0.2422             | 0.0229            | 96.8753  |
|             |        |        | largest_value  | 0.2642             | 0.0237            | 105.6883 |
| Westonia    | S30    | N25    | smallest_value | 0.2249             | 0.0205            | 89.9455  |
|             |        |        | largest_value  | 0.2614             | 0.0240            | 104.5584 |
| Livingston  | S30    | N25    | smallest_value | 0.1716             | 0.0149            | 68.6494  |
|             |        |        | largest_value  | 0.2437             | 0.0228            | 97.4831  |
| Mace        | S30    | N25    | smallest_value | 0.2785             | 0.0236            | 111.3896 |
|             |        |        | largest_value  | 0.2924             | 0.0257            | 116.9506 |
| Wyalkatchem | S50    | N25    | smallest_value | 0.2500             | 0.0236            | 100.0000 |
|             |        |        | largest_value  | 0.2595             | 0.0248            | 103.8104 |
| Westonia    | S50    | N25    | smallest_value | 0.2511             | 0.0221            | 100.4545 |
|             |        |        | largest_value  | 0.2640             | 0.0245            | 105.6130 |
| Livingston  | S50    | N25    | smallest_value | 0.2419             | 0.0233            | 96.7688  |
|             |        |        | largest_value  | 0.2603             | 0.0246            | 104.1221 |
| Mace        | S50    | N25    | smallest_value | 0.2512             | 0.0205            | 100.4961 |
|             |        |        | largest_value  | 0.3194             | 0.0270            | 127.7792 |

| Glasshouse_experiment |        |        |                | GrainYield_(g/pot) | NUE_GY | neckdiameter |
|-----------------------|--------|--------|----------------|--------------------|--------|--------------|
| Varname               | Streat | Ntreat | range          |                    |        |              |
| Spitfire              | S0     | N25    | smallest_value | 1.0060             | 0.4024 | 1.5000       |
|                       |        |        | largest_value  | 1.6330             | 0.6532 | 1.5800       |
| Wyalkatchem           | S0     | N25    | smallest_value | 0.9080             | 0.3632 | 1.3700       |
|                       |        |        | largest_value  | 1.4010             | 0.5604 | 1.4900       |
| Spitfire              | S30    | N25    | smallest_value | 1.8330             | 0.7332 | 1.5386       |
|                       |        |        | largest_value  | 2.8550             | 1.1420 | 1.5700       |
| Wyalkatchem           | S30    | N25    | smallest_value | 1.6410             | 0.6564 | 1.6800       |
|                       |        |        | largest_value  | 1.9260             | 0.7704 | 1.7500       |
| Spitfire              | S50    | N25    | smallest_value | 3.0900             | 1.2360 | 1.4100       |
|                       |        |        | largest_value  | 3.3980             | 1.3592 | 1.4800       |
| Wyalkatchem           | S50    | N25    | smallest_value | 2.5880             | 1.0352 | 1.6100       |
|                       |        |        | largest_value  | 3.6120             | 1.4448 | 1.6600       |

| NUE_PY  | glu/gli | $\omega_5\%$ | $\omega_{1,2\%}$ | $\alpha/\beta\%$ | $\gamma\%$ | $\omega\%$ | gliadins% |
|---------|---------|--------------|------------------|------------------|------------|------------|-----------|
| 7.9163  | 0.3349  | 0.0205       | 0.0383           | 0.2804           | 0.3101     | 0.0588     | 0.6981    |
| 8.3265  | 0.4324  | 0.0211       | 0.0435           | 0.3448           | 0.3692     | 0.0645     | 0.7491    |
| 6.6357  | 0.3712  | 0.0212       | 0.0470           | 0.3205           | 0.2949     | 0.0690     | 0.6845    |
| 8.6641  | 0.4609  | 0.0270       | 0.0478           | 0.3452           | 0.3101     | 0.0740     | 0.7293    |
| 6.4955  | 0.1910  | 0.0237       | 0.0500           | 0.3727           | 0.3163     | 0.0738     | 0.7731    |
| 7.9524  | 0.2936  | 0.0398       | 0.0591           | 0.4054           | 0.3489     | 0.0989     | 0.8396    |
| 7.3828  | 0.2355  | 0.0241       | 0.0421           | 0.3409           | 0.3351     | 0.0676     | 0.7545    |
| 8.7738  | 0.3254  | 0.0285       | 0.0549           | 0.3656           | 0.3851     | 0.0834     | 0.8094    |
| 9.1494  | 0.6097  | 0.0123       | 0.0300           | 0.2213           | 0.2479     | 0.0428     | 0.5120    |
| 9.4892  | 0.9531  | 0.0203       | 0.0353           | 0.2852           | 0.2979     | 0.0556     | 0.6212    |
| 8.2010  | 0.6673  | 0.0129       | 0.0319           | 0.2279           | 0.2449     | 0.0476     | 0.5246    |
| 9.5828  | 0.9061  | 0.0177       | 0.0462           | 0.2753           | 0.2777     | 0.0591     | 0.5998    |
| 5.9488  | 0.5111  | 0.0168       | 0.0364           | 0.2919           | 0.2647     | 0.0553     | 0.6137    |
| 9.1068  | 0.6294  | 0.0234       | 0.0424           | 0.3257           | 0.2725     | 0.0658     | 0.6618    |
| 9.4356  | 0.4717  | 0.0160       | 0.0305           | 0.2015           | 0.2701     | 0.0470     | 0.5186    |
| 10.2972 | 0.9282  | 0.0182       | 0.0395           | 0.3189           | 0.3048     | 0.0559     | 0.6795    |
| 9.4374  | 0.4620  | 0.0104       | 0.0349           | 0.2944           | 0.2832     | 0.0502     | 0.6300    |
| 9.9313  | 0.5873  | 0.0165       | 0.0399           | 0.3211           | 0.3115     | 0.0524     | 0.6840    |
| 8.8287  | 0.4056  | 0.0095       | 0.0472           | 0.3251           | 0.2719     | 0.0566     | 0.6642    |
| 9.7842  | 0.5055  | 0.0109       | 0.0636           | 0.3522           | 0.2900     | 0.0744     | 0.7115    |
| 9.3366  | 0.4158  | 0.0041       | 0.0596           | 0.3464           | 0.2557     | 0.0647     | 0.6707    |
| 9.8345  | 0.4910  | 0.0055       | 0.0644           | 0.3682           | 0.2842     | 0.0685     | 0.7063    |
| 8.1896  | 0.4178  | 0.0056       | 0.0593           | 0.3203           | 0.2810     | 0.0668     | 0.7046    |
| 10.7862 | 0.4192  | 0.0075       | 0.0652           | 0.3564           | 0.3129     | 0.0713     | 0.7053    |

| headweig | pedunclel | strawdia | keycarddia | necktocard | strawweig | glu/gli | $\omega_5\%$ | $\omega_{1,2\%}$ |
|----------|-----------|----------|------------|------------|-----------|---------|--------------|------------------|
| 1.0400   | 13.0000   | 1.6100   | 1.5000     | 1.0000     | 0.0500    | 0.5442  | 0.0115       | 0.0344           |
| 1.1529   | 19.4286   | 1.6471   | 1.5714     | 4.6429     | 0.0514    | 0.6495  | 0.0164       | 0.0371           |
| 0.7100   | 14.0000   | 1.5900   | 1.5000     | 2.0000     | 0.0500    | 0.5379  | 0.0108       | 0.0284           |
| 0.9300   | 15.5000   | 1.6600   | 1.5000     | 5.0000     | 0.0557    | 0.6442  | 0.0173       | 0.0367           |
| 1.3900   | 22.2857   | 1.8400   | 1.8571     | 8.0000     | 0.0571    | 0.9867  | 0.0097       | 0.0202           |
| 1.4800   | 25.0000   | 1.9600   | 2.0000     | 12.0000    | 0.0700    | 1.1634  | 0.0119       | 0.0237           |
| 1.2800   | 17.0000   | 1.8429   | 1.8571     | 3.7857     | 0.0500    | 0.8120  | 0.0085       | 0.0185           |
| 1.5500   | 20.0000   | 1.9500   | 2.0000     | 4.5000     | 0.0700    | 1.3163  | 0.0086       | 0.0210           |
| 1.4457   | 19.5000   | 1.6100   | 1.5000     | 3.0000     | 0.0500    | 1.1081  | 0.0158       | 0.0213           |
| 1.5000   | 21.5000   | 1.9400   | 2.0000     | 10.0000    | 0.0800    | 1.2100  | 0.0217       | 0.0301           |
| 1.3100   | 18.0000   | 1.8957   | 1.9286     | 6.3571     | 0.0543    | 0.6710  | 0.0192       | 0.0238           |
| 1.4800   | 21.5000   | 2.1300   | 2.0000     | 9.0000     | 0.0600    | 0.7600  | 0.0253       | 0.0290           |

| $\alpha/\beta\%$ | $\gamma\%$ | $\omega\%$ | gliadins% |
|------------------|------------|------------|-----------|
| 0.2970           | 0.2491     | 0.0464     | 0.6062    |
| 0.3450           | 0.2628     | 0.0535     | 0.6476    |
| 0.2875           | 0.2815     | 0.0392     | 0.6082    |
| 0.3067           | 0.3073     | 0.0486     | 0.6502    |
| 0.2288           | 0.1845     | 0.0321     | 0.4622    |
| 0.2660           | 0.2175     | 0.0379     | 0.5033    |
| 0.2113           | 0.1934     | 0.0270     | 0.4317    |
| 0.2713           | 0.2514     | 0.0296     | 0.5519    |
| 0.2156           | 0.1864     | 0.0374     | 0.4525    |
| 0.2420           | 0.1988     | 0.0463     | 0.4744    |
| 0.2415           | 0.2730     | 0.0430     | 0.5682    |
| 0.2617           | 0.2912     | 0.0537     | 0.5984    |
