# Supplementary material for: Impact and mechanism of sulphur-deficiency on modern wheat farming nitrogen-related sustainability and gliadin content
Source: PubMed Central journal article supplement (PMC8346565; doi:10.1038/s42003-021-02458-7), 2021-08-06
Supplement: 42003_2021_2458_MOESM13_ESM.pdf [file 42003_2021_2458_MOESM13_ESM.pdf]

| Vurname     | Streat | Ntreat | GrainYield_(kg/m2) | ProtYield_(kg/m2) | NUE_GY   | NUE_PY  |
|-------------|--------|--------|--------------------|-------------------|----------|---------|
| Wyalkatchem | S0     | N25    | 0.2258             | 0.0198            | 90.3325  | 7.9163  |
| Wyalkatchem | S0     | N25    | 0.2276             | 0.0201            | 91.0260  | 8.0390  |
| Wyalkatchem | S0     | N25    | 0.2266             | 0.0208            | 90.6494  | 8.3265  |
| Westonia    | S0     | N25    | 0.2090             | 0.0179            | 83.6182  | 7.1631  |
| Westonia    | S0     | N25    | 0.2404             | 0.0217            | 96.1792  | 8.6641  |
| Westonia    | S0     | N25    | 0.1895             | 0.0166            | 75.8156  | 6.6357  |
| Livingston  | S0     | N25    | 0.2085             | 0.0174            | 83.3974  | 6.9765  |
| Livingston  | S0     | N25    | 0.1853             | 0.0162            | 74.1143  | 6.4955  |
| Livingston  | S0     | N25    | 0.2211             | 0.0199            | 88.4312  | 7.9524  |
| Mace        | S0     | N25    | 0.2280             | 0.0185            | 91.2052  | 7.4112  |
| Mace        | S0     | N25    | 0.2205             | 0.0185            | 88.1870  | 7.3828  |
| Mace        | S0     | N25    | 0.2499             | 0.0219            | 99.9455  | 8.7738  |
| Wyalkatchem | S30    | N25    | 0.2569             | 0.0229            | 102.7506 | 9.1494  |
| Wyalkatchem | S30    | N25    | 0.2642             | 0.0237            | 105.6883 | 9.4892  |
| Wyalkatchem | S30    | N25    | 0.2422             | 0.0235            | 96.8753  | 9.4196  |
| Westonia    | S30    | N25    | 0.2614             | 0.0240            | 104.5584 | 9.5828  |
| Westonia    | S30    | N25    | 0.2249             | 0.0205            | 89.9455  | 8.2010  |
| Westonia    | S30    | N25    | 0.2484             | 0.0227            | 99.3714  | 9.0725  |
| Livingston  | S30    | N25    | 0.2437             | 0.0228            | 97.4831  | 9.1068  |
| Livingston  | S30    | N25    | 0.1716             | 0.0149            | 68.6494  | 5.9488  |
| Livingston  | S30    | N25    | 0.2392             | 0.0218            | 95.6649  | 8.7323  |
| Mace        | S30    | N25    | 0.2924             | 0.0257            | 116.9506 | 10.2972 |
| Mace        | S30    | N25    | 0.2785             | 0.0236            | 111.3896 | 9.4356  |
| Mace        | S30    | N25    | 0.2860             | 0.0247            | 114.4078 | 9.8798  |
| Wyalkatchem | S50    | N25    | 0.2558             | 0.0236            | 102.3117 | 9.4374  |
| Wyalkatchem | S50    | N25    | 0.2595             | 0.0248            | 103.8104 | 9.9313  |
| Wyalkatchem | S50    | N25    | 0.2500             | 0.0247            | 100.0000 | 9.8892  |
| Westonia    | S50    | N25    | 0.2511             | 0.0221            | 100.4545 | 8.8287  |
| Westonia    | S50    | N25    | 0.2534             | 0.0226            | 101.3610 | 9.0427  |
| Westonia    | S50    | N25    | 0.2640             | 0.0245            | 105.6130 | 9.7842  |
| Livingston  | S50    | N25    | 0.2603             | 0.0246            | 104.1221 | 9.8274  |
| Livingston  | S50    | N25    | 0.2419             | 0.0246            | 96.7688  | 9.8345  |
| Livingston  | S50    | N25    | 0.2508             | 0.0233            | 100.3247 | 9.3366  |
| Mace        | S50    | N25    | 0.3194             | 0.0270            | 127.7792 | 10.7862 |
| Mace        | S50    | N25    | 0.2879             | 0.0259            | 115.1506 | 10.3667 |
| Mace        | S50    | N25    | 0.2512             | 0.0205            | 100.4961 | 8.1896  |

| Vurname     | Streat | Ntreat | GrainYield_(g/pot) | NUE_GY | neckdiameter | headweight |
|-------------|--------|--------|--------------------|--------|--------------|------------|
| Spitfire    | S0     | N25    | 1.6330             | 0.6532 | 1.5043       | 1.1529     |
| Spitfire    | S0     | N25    | 1.0340             | 0.4136 | 1.5000       | 1.0900     |
| Spitfire    | S0     | N25    | 1.0060             | 0.4024 | 1.5800       | 1.0400     |
| Wyalkatchem | S0     | N25    | 1.4010             | 0.5604 | 1.4186       | 0.8471     |
| Wyalkatchem | S0     | N25    | 0.9080             | 0.3632 | 1.3700       | 0.7100     |
| Wyalkatchem | S0     | N25    | 1.2620             | 0.5048 | 1.4900       | 0.9300     |
| Spitfire    | S30    | N25    | 2.8550             | 1.1420 | 1.5386       | 1.4514     |
| Spitfire    | S30    | N25    | 2.6930             | 1.0772 | 1.5400       | 1.4800     |
| Spitfire    | S30    | N25    | 1.8330             | 0.7332 | 1.5700       | 1.3900     |
| Wyalkatchem | S30    | N25    | 1.9260             | 0.7704 | 1.6943       | 1.3186     |
| Wyalkatchem | S30    | N25    | 1.6410             | 0.6564 | 1.6800       | 1.5500     |
| Wyalkatchem | S30    | N25    | 1.7750             | 0.7100 | 1.7500       | 1.2800     |
| Spitfire    | S50    | N25    | 3.3980             | 1.3592 | 1.4743       | 1.4457     |
| Spitfire    | S50    | N25    | 3.0900             | 1.2360 | 1.4100       | 1.5000     |
| Spitfire    | S50    | N25    | 3.2860             | 1.3144 | 1.4800       | 1.4900     |
| Wyalkatchem | S50    | N25    | 3.6120             | 1.4448 | 1.6100       | 1.3171     |
| Wyalkatchem | S50    | N25    | 2.5880             | 1.0352 | 1.6400       | 1.4800     |
| Wyalkatchem | S50    | N25    | 3.5350             | 1.4140 | 1.6600       | 1.3100     |

| pedunclelength | strawdiameter | keycarddiameter | necktocard | strawweight |
|----------------|---------------|-----------------|------------|-------------|
| 19.4286        | 1.6471        | 1.5714          | 4.6429     | 0.0514      |
| 15.5000        | 1.6100        | 1.5000          | 2.0000     | 0.0500      |
| 13.0000        | 1.6200        | 1.5000          | 1.0000     | 0.0500      |
| 14.1429        | 1.6486        | 1.5000          | 4.2143     | 0.0557      |
| 14.0000        | 1.5900        | 1.5000          | 5.0000     | 0.0500      |
| 15.5000        | 1.6600        | 1.5000          | 2.0000     | 0.0500      |
| 22.2857        | 1.8400        | 1.8571          | 8.9286     | 0.0571      |
| 25.0000        | 1.8600        | 2.0000          | 12.0000    | 0.0700      |
| 23.0000        | 1.9600        | 2.0000          | 8.0000     | 0.0700      |
| 17.2857        | 1.8429        | 1.8571          | 3.7857     | 0.0614      |
| 17.0000        | 1.9400        | 2.0000          | 4.5000     | 0.0500      |
| 20.0000        | 1.9500        | 2.0000          | 4.5000     | 0.0700      |
| 21.5000        | 1.7786        | 1.7143          | 6.4286     | 0.0543      |
| 21.0000        | 1.6100        | 1.5000          | 3.0000     | 0.0500      |
| 19.5000        | 1.9400        | 2.0000          | 10.0000    | 0.0800      |
| 18.1429        | 1.8957        | 1.9286          | 6.3571     | 0.0543      |
| 21.5000        | 1.9800        | 2.0000          | 7.0000     | 0.0600      |
| 18.0000        | 2.1300        | 2.0000          | 9.0000     | 0.0600      |

| Streat | DPA   | REP   | ASP    | GLU    | ASN    | SER    | GLN    | ARG    | GLY    | THR    | PRO    | ALA    |
|--------|-------|-------|--------|--------|--------|--------|--------|--------|--------|--------|--------|--------|
| S0     | 7DPA  | tech1 | 0.8669 | 3.3690 | 0.9461 | 1.1841 | 3.1922 | 0.7518 | 0.1061 | 0.3370 | 1.3643 | 1.9004 |
| S0     | 7DPA  | tech2 | 0.8604 | 3.3556 | 0.9370 | 1.1853 | 3.0726 | 0.7455 | 0.1128 | 0.3252 | 1.3494 | 1.8991 |
| S0     | 7DPA  | tech3 | 0.8649 | 3.3683 | 0.9471 | 1.1875 | 3.1249 | 0.7506 | 0.1102 | 0.3327 | 1.3518 | 1.9015 |
| S0     | 14DPA | tech1 | 1.6091 | 6.6949 | 2.1035 | 2.5285 | 2.4771 | 0.3691 | 1.8091 | 0.7734 | 0.5602 | 8.0339 |
| S0     | 14DPA | tech2 | 1.6090 | 6.6971 | 2.1041 | 2.5399 | 2.2955 | 0.3317 | 1.8609 | 0.7535 | 0.5590 | 8.0259 |
| S0     | 14DPA | tech3 | 1.6010 | 6.6995 | 2.1045 | 2.5338 | 2.2831 | 0.3440 | 1.8381 | 0.7619 | 0.5585 | 8.0193 |
| S0     | 21DPA | tech1 | 1.4182 | 5.6435 | 0.5112 | 1.2849 | 1.1590 | 0.1851 | 0.4001 | 0.6143 | 0.5508 | 4.6485 |
| S0     | 21DPA | tech2 | 1.4138 | 5.6232 | 0.5109 | 1.2857 | 1.0892 | 0.1747 | 0.4292 | 0.5692 | 0.5489 | 4.6421 |
| S0     | 21DPA | tech3 | 1.4133 | 5.6160 | 0.5103 | 1.2853 | 1.0812 | 0.1723 | 0.4331 | 0.5667 | 0.5482 | 4.6411 |
| S0     | 28DPA | tech1 | 1.1882 | 4.3563 | 0.3798 | 0.7891 | 1.1904 | 0.1738 | 0.2419 | 0.4181 | 0.3830 | 3.9767 |
| S0     | 28DPA | tech2 | 1.1858 | 4.3378 | 0.3794 | 0.7879 | 1.1069 | 0.1678 | 0.2538 | 0.4098 | 0.3836 | 3.9703 |
| S0     | 28DPA | tech3 | 1.1825 | 4.3413 | 0.3792 | 0.7882 | 1.1488 | 0.1680 | 0.2496 | 0.4135 | 0.3831 | 3.9660 |
| S0     | 35DPA | tech1 | 2.2229 | 4.4057 | 1.3497 | 0.6551 | 0.9039 | 0.9669 | 0.7246 | 0.4205 | 0.3553 | 4.3246 |
| S0     | 35DPA | tech2 | 2.2240 | 4.4087 | 1.3477 | 0.6562 | 0.8765 | 0.9542 | 0.7377 | 0.4187 | 0.3509 | 4.3242 |
| S0     | 35DPA | tech3 | 2.2208 | 4.4033 | 1.3472 | 0.6556 | 0.9145 | 0.9506 | 0.7352 | 0.4224 | 0.3508 | 4.3244 |
| S0     | 42DPA | tech1 | 2.0633 | 1.5455 | 1.7143 | 0.3080 | 0.2035 | 0.8386 | 0.3678 | 0.2293 | 0.3072 | 2.0903 |
| S0     | 42DPA | tech2 | 2.0863 | 1.5579 | 1.7323 | 0.3099 | 0.1638 | 0.8322 | 0.3941 | 0.2207 | 0.3073 | 2.1108 |
| S0     | 42DPA | tech3 | 2.0853 | 1.5644 | 1.7336 | 0.3104 | 0.1864 | 0.8345 | 0.3869 | 0.2271 | 0.3076 | 2.1124 |
| S30    | 7DPA  | tech1 | 0.8336 | 3.5560 | 0.7681 | 1.4708 | 3.0318 | 0.6630 | 0.2212 | 0.3796 | 1.7002 | 3.2037 |
| S30    | 7DPA  | tech2 | 0.8286 | 3.5408 | 0.7672 | 1.4763 | 2.8984 | 0.6476 | 0.2491 | 0.3623 | 1.6933 | 3.1998 |
| S30    | 7DPA  | tech3 | 0.8288 | 3.5358 | 0.7658 | 1.4736 | 2.8980 | 0.6423 | 0.2507 | 0.3620 | 1.6929 | 3.1992 |
| S30    | 14DPA | tech1 | 1.4621 | 7.2703 | 1.4722 | 2.8608 | 1.5078 | 0.2808 | 1.9312 | 0.8430 | 0.4906 | 7.4194 |
| S30    | 14DPA | tech2 | 1.4622 | 7.2577 | 1.4724 | 2.8610 | 1.2424 | 0.2447 | 2.0033 | 0.8011 | 0.4890 | 7.4134 |
| S30    | 14DPA | tech3 | 1.4606 | 7.2676 | 1.4719 | 2.8614 | 1.2530 | 0.2460 | 1.9915 | 0.8101 | 0.4885 | 7.4119 |
| S30    | 21DPA | tech1 | 1.6772 | 3.8222 | 0.7751 | 1.4016 | 0.6603 | 0.2103 | 0.8816 | 0.5441 | 0.4920 | 3.5383 |
| S30    | 21DPA | tech2 | 1.6791 | 3.8178 | 0.7761 | 1.3997 | 0.5866 | 0.1969 | 0.9087 | 0.4997 | 0.4918 | 3.5377 |
| S30    | 21DPA | tech3 | 1.6770 | 3.8118 | 0.7738 | 1.3990 | 0.6077 | 0.1966 | 0.9044 | 0.5028 | 0.4881 | 3.5299 |
| S30    | 28DPA | tech1 | 1.2057 | 5.1669 | 1.1770 | 0.8149 | 1.2708 | 0.1859 | 0.6312 | 0.4106 | 0.2428 | 5.5364 |
| S30    | 28DPA | tech2 | 1.2070 | 5.1600 | 1.1760 | 0.8150 | 1.1870 | 0.1787 | 0.6417 | 0.4059 | 0.2426 | 5.5284 |
| S30    | 28DPA | tech3 | 1.2026 | 5.1545 | 1.1737 | 0.8133 | 1.2416 | 0.1777 | 0.6390 | 0.4085 | 0.2437 | 5.5218 |
| S30    | 35DPA | tech1 | 1.4425 | 3.2929 | 1.3269 | 0.5041 | 0.9254 | 0.5015 | 0.4418 | 0.3028 | 0.3214 | 3.2223 |
| S30    | 35DPA | tech2 | 1.4511 | 3.2963 | 1.3289 | 0.5044 | 0.8864 | 0.4918 | 0.4548 | 0.2826 | 0.3219 | 3.2224 |
| S30    | 35DPA | tech3 | 1.4483 | 3.2939 | 1.3282 | 0.5043 | 0.8891 | 0.4884 | 0.4570 | 0.2829 | 0.3214 | 3.2222 |
| S30    | 42DPA | tech1 | 1.0230 | 0.4383 | 0.5918 | 0.1934 | 0.1121 | 0.2622 | 0.2029 | 0.1669 | 0.2127 | 1.1440 |
| S30    | 42DPA | tech2 | 1.0243 | 0.4430 | 0.5963 | 0.1966 | 0.1068 | 0.2558 | 0.2155 | 0.1645 | 0.2144 | 1.1419 |
| S30    | 42DPA | tech3 | 1.0198 | 0.4372 | 0.5914 | 0.1935 | 0.1109 | 0.2553 | 0.2109 | 0.1656 | 0.2125 | 1.1434 |

| TYR    | VAL    | MET    | CYS    | ILE    | LEU    | PHE    | AA      |
|--------|--------|--------|--------|--------|--------|--------|---------|
| 0.0118 | 0.1680 | 1.0102 | 0.2041 | 0.3643 | 0.4224 | 0.1263 | 16.3248 |
| 0.0129 | 0.1689 | 1.0135 | 0.2045 | 0.3653 | 0.4238 | 0.1266 | 16.1585 |
| 0.0132 | 0.1686 | 1.0118 | 0.2041 | 0.3634 | 0.4221 | 0.1262 | 16.2489 |
| 0.0086 | 0.2798 | 1.5838 | 0.1021 | 0.2964 | 0.4411 | 0.2020 | 29.2876 |
| 0.0107 | 0.2802 | 1.5838 | 0.1061 | 0.2974 | 0.4417 | 0.2025 | 29.6989 |
| 0.0125 | 0.2800 | 1.5847 | 0.1052 | 0.2974 | 0.4418 | 0.2026 | 29.6679 |
| 0.0448 | 0.1137 | 0.8497 | 0.0771 | 0.3894 | 0.3639 | 0.1710 | 18.4251 |
| 0.0449 | 0.1141 | 0.8498 | 0.0766 | 0.3893 | 0.3634 | 0.1706 | 18.2956 |
| 0.0451 | 0.1140 | 0.8497 | 0.0767 | 0.3887 | 0.3628 | 0.1706 | 18.2751 |
| 0.0636 | 0.0793 | 0.7904 | 0.0739 | 0.5409 | 0.3246 | 0.2191 | 15.1891 |
| 0.0636 | 0.0793 | 0.7895 | 0.0736 | 0.5402 | 0.3238 | 0.2187 | 15.0717 |
| 0.0637 | 0.0793 | 0.7906 | 0.0738 | 0.5395 | 0.3235 | 0.2185 | 15.1090 |
| 0.0703 | 0.1374 | 2.2247 | 0.1087 | 0.4867 | 0.4520 | 0.1934 | 20.0025 |
| 0.0703 | 0.1376 | 2.2236 | 0.1081 | 0.4874 | 0.4523 | 0.1939 | 19.9721 |
| 0.0697 | 0.1376 | 2.2244 | 0.1079 | 0.4870 | 0.4518 | 0.1936 | 19.9968 |
| 0.0221 | 0.0858 | 0.5236 | 0.0224 | 0.2188 | 0.3019 | 0.1380 | 10.9806 |
| 0.0245 | 0.0897 | 0.5343 | 0.0236 | 0.2207 | 0.3049 | 0.1392 | 11.0525 |
| 0.0239 | 0.0870 | 0.5305 | 0.0227 | 0.2211 | 0.3052 | 0.1393 | 11.0844 |
| 0.0204 | 0.1522 | 1.9538 | 0.1464 | 0.2666 | 0.3649 | 0.1272 | 18.8596 |
| 0.0229 | 0.1525 | 1.0172 | 0.1453 | 0.2651 | 0.3628 | 0.1265 | 17.7556 |
| 0.0229 | 0.1524 | 1.0387 | 0.1444 | 0.2652 | 0.3628 | 0.1264 | 17.7620 |
| 0.0546 | 0.2556 | 1.2610 | 0.0940 | 0.2866 | 0.4231 | 0.2110 | 28.1241 |
| 0.0129 | 0.2558 | 1.2610 | 0.0925 | 0.2852 | 0.4223 | 0.2116 | 27.7883 |
| 0.0542 | 0.2555 | 1.2620 | 0.0926 | 0.2852 | 0.4224 | 0.2112 | 27.8458 |
| 0.0291 | 0.1283 | 0.6444 | 0.0093 | 0.2183 | 0.3328 | 0.1823 | 15.5473 |
| 0.0152 | 0.1284 | 0.6445 | 0.0096 | 0.2180 | 0.3322 | 0.1822 | 15.4241 |
| 0.0284 | 0.1282 | 0.6443 | 0.0096 | 0.2176 | 0.3315 | 0.1818 | 15.4326 |
| 0.0450 | 0.0748 | 0.5470 | 0.0517 | 0.1465 | 0.2087 | 0.1403 | 17.8562 |
| 0.0450 | 0.0748 | 0.5476 | 0.0515 | 0.1469 | 0.2093 | 0.1407 | 17.7583 |
| 0.0449 | 0.0749 | 0.5482 | 0.0515 | 0.1454 | 0.2080 | 0.1400 | 17.7892 |
| 0.0618 | 0.0704 | 1.6023 | 0.0990 | 0.6064 | 0.4492 | 0.2328 | 15.4034 |
| 0.0624 | 0.0706 | 1.6011 | 0.0985 | 0.6066 | 0.4490 | 0.2329 | 15.3618 |
| 0.0628 | 0.0708 | 1.6009 | 0.0985 | 0.6056 | 0.4483 | 0.2324 | 15.3550 |
| 0.0099 | 0.0295 | 0.3992 | 0.0303 | 0.1580 | 0.2586 | 0.0870 | 5.3197  |
| 0.0102 | 0.0008 | 0.3991 | 0.0307 | 0.1573 | 0.2573 | 0.0866 | 5.3009  |
| 0.0099 | 0.0006 | 0.3987 | 0.0308 | 0.1579 | 0.2583 | 0.0868 | 5.2834  |

**Flag leaves**

| Varname     |     | tech_1      | tech_2      | tech_3      |
|-------------|-----|-------------|-------------|-------------|
| Spitfire    | S0  | 9.90455E-05 | 9.88026E-05 | 9.71018E-05 |
| Spitfire    | S30 | 7.43837E-05 | 7.38681E-05 | 7.40154E-05 |
| Wyalkatchem | S0  | 9.01103E-05 | 9.05248E-05 | 9.06906E-05 |
| Wyalkatchem | S30 | 6.41424E-05 | 6.39658E-05 | 6.42012E-05 |

**Developing grains**

| Varname     | DPA | S0_tech1    | S0_tech2    | S0_tech3    | S30_tech1   | S30_tech2   |
|-------------|-----|-------------|-------------|-------------|-------------|-------------|
| Spitfire    | 7   | 7.24205E-06 | 6.89078E-06 | 6.93469E-06 | 6.44705E-06 | 6.81042E-06 |
| Spitfire    | 14  | 7.29908E-06 | 7.20837E-06 | 7.02695E-06 | 8.52393E-06 | 7.49416E-06 |
| Spitfire    | 21  | 4.10227E-06 | 4.14252E-06 | 4.38398E-06 | 6.85779E-06 | 5.33324E-06 |
| Spitfire    | 28  | 9.50135E-06 | 1.01802E-05 | 1.01425E-05 | 1.56897E-05 | 1.62693E-05 |
| Spitfire    | 35  | 7.08976E-06 | 7.13173E-06 | 6.37633E-06 | 1.69322E-05 | 1.66226E-05 |
| Wyalkatchem | 7   | 4.69602E-06 | 4.12895E-06 | 3.84541E-06 | 3.63968E-06 | 3.718E-06   |
| Wyalkatchem | 14  | 1.0465E-05  | 8.14836E-06 | 8.49157E-06 | 4.28681E-06 | 3.40489E-06 |
| Wyalkatchem | 21  | 9.84106E-06 | 6.87503E-06 | 6.44517E-06 | 2.85529E-06 | 3.0839E-06  |
| Wyalkatchem | 28  | 6.23682E-06 | 6.1955E-06  | 6.56739E-06 | 1.12291E-05 | 8.33335E-06 |
| Wyalkatchem | 35  | 6.08059E-06 | 4.98127E-06 | 5.89737E-06 | 1.03374E-05 | 7.31555E-06 |

S30\_tech3

6.62874E-06

7.45297E-06

5.62968E-06

1.57789E-05

1.56941E-05

2.77809E-06

3.48506E-06

1.21687E-06

8.02623E-06

6.18693E-06

| Vurname     | Streat | Ntreat | glu/gli | $\omega_{5\%}$ | $\omega_{1,2\%}$ | $\alpha/\beta\%$ | $\gamma\%$ | $\omega\%$ | gliadins% |
|-------------|--------|--------|---------|----------------|------------------|------------------|------------|------------|-----------|
| Livingston  | S0     | N25    | 0.2936  | 0.0301         | 0.0541           | 0.3727           | 0.3163     | 0.0841     | 0.7731    |
| Livingston  | S0     | N25    | 0.2507  | 0.0237         | 0.0500           | 0.3769           | 0.3489     | 0.0738     | 0.7995    |
| Livingston  | S0     | N25    | 0.1910  | 0.0398         | 0.0591           | 0.4054           | 0.3353     | 0.0989     | 0.8396    |
| Mace        | S0     | N25    | 0.3017  | 0.0241         | 0.0435           | 0.3656           | 0.3351     | 0.0676     | 0.7682    |
| Mace        | S0     | N25    | 0.3254  | 0.0266         | 0.0421           | 0.3464           | 0.3394     | 0.0687     | 0.7545    |
| Mace        | S0     | N25    | 0.2355  | 0.0285         | 0.0549           | 0.3409           | 0.3851     | 0.0834     | 0.8094    |
| Westonia    | S0     | N25    | 0.4125  | 0.0250         | 0.0478           | 0.3358           | 0.2993     | 0.0728     | 0.7080    |
| Westonia    | S0     | N25    | 0.3712  | 0.0270         | 0.0470           | 0.3452           | 0.3101     | 0.0740     | 0.7293    |
| Westonia    | S0     | N25    | 0.4609  | 0.0212         | 0.0478           | 0.3205           | 0.2949     | 0.0690     | 0.6845    |
| Wyalkatchem | S0     | N25    | 0.3349  | 0.0211         | 0.0435           | 0.3448           | 0.3398     | 0.0645     | 0.7491    |
| Wyalkatchem | S0     | N25    | 0.4324  | 0.0208         | 0.0401           | 0.3271           | 0.3101     | 0.0609     | 0.6981    |
| Wyalkatchem | S0     | N25    | 0.4118  | 0.0205         | 0.0383           | 0.2804           | 0.3692     | 0.0588     | 0.7083    |
| Livingston  | S30    | N25    | 0.6294  | 0.0168         | 0.0404           | 0.2919           | 0.2647     | 0.0572     | 0.6137    |
| Livingston  | S30    | N25    | 0.5967  | 0.0189         | 0.0364           | 0.2984           | 0.2725     | 0.0553     | 0.6263    |
| Livingston  | S30    | N25    | 0.5111  | 0.0234         | 0.0424           | 0.3257           | 0.2703     | 0.0658     | 0.6618    |
| Mace        | S30    | N25    | 0.4717  | 0.0182         | 0.0376           | 0.3189           | 0.3048     | 0.0559     | 0.6795    |
| Mace        | S30    | N25    | 0.6137  | 0.0160         | 0.0395           | 0.2764           | 0.2879     | 0.0555     | 0.6197    |
| Mace        | S30    | N25    | 0.9282  | 0.0165         | 0.0305           | 0.2015           | 0.2701     | 0.0470     | 0.5186    |
| Westonia    | S30    | N25    | 0.6758  | 0.0129         | 0.0462           | 0.2753           | 0.2623     | 0.0591     | 0.5967    |
| Westonia    | S30    | N25    | 0.9061  | 0.0177         | 0.0341           | 0.2279           | 0.2449     | 0.0518     | 0.5246    |
| Westonia    | S30    | N25    | 0.6673  | 0.0157         | 0.0319           | 0.2745           | 0.2777     | 0.0476     | 0.5998    |
| Wyalkatchem | S30    | N25    | 0.6275  | 0.0142         | 0.0300           | 0.2852           | 0.2850     | 0.0443     | 0.6144    |
| Wyalkatchem | S30    | N25    | 0.6097  | 0.0203         | 0.0353           | 0.2678           | 0.2979     | 0.0556     | 0.6212    |
| Wyalkatchem | S30    | N25    | 0.9531  | 0.0123         | 0.0305           | 0.2213           | 0.2479     | 0.0428     | 0.5120    |
| Livingston  | S50    | N25    | 0.4298  | 0.0055         | 0.0630           | 0.3467           | 0.2842     | 0.0685     | 0.6994    |
| Livingston  | S50    | N25    | 0.4910  | 0.0041         | 0.0644           | 0.3464           | 0.2557     | 0.0685     | 0.6707    |
| Livingston  | S50    | N25    | 0.4158  | 0.0050         | 0.0596           | 0.3682           | 0.2734     | 0.0647     | 0.7063    |
| Mace        | S50    | N25    | 0.4187  | 0.0075         | 0.0593           | 0.3381           | 0.3000     | 0.0668     | 0.7049    |
| Mace        | S50    | N25    | 0.4192  | 0.0061         | 0.0652           | 0.3203           | 0.3129     | 0.0713     | 0.7046    |
| Mace        | S50    | N25    | 0.4178  | 0.0056         | 0.0623           | 0.3564           | 0.2810     | 0.0679     | 0.7053    |
| Westonia    | S50    | N25    | 0.4056  | 0.0109         | 0.0636           | 0.3522           | 0.2848     | 0.0744     | 0.7115    |
| Westonia    | S50    | N25    | 0.5055  | 0.0096         | 0.0535           | 0.3293           | 0.2719     | 0.0631     | 0.6642    |
| Westonia    | S50    | N25    | 0.4885  | 0.0095         | 0.0472           | 0.3251           | 0.2900     | 0.0566     | 0.6718    |
| Wyalkatchem | S50    | N25    | 0.5366  | 0.0104         | 0.0399           | 0.3011           | 0.2995     | 0.0502     | 0.6508    |
| Wyalkatchem | S50    | N25    | 0.4620  | 0.0165         | 0.0349           | 0.3211           | 0.3115     | 0.0514     | 0.6840    |
| Wyalkatchem | S50    | N25    | 0.5873  | 0.0138         | 0.0386           | 0.2944           | 0.2832     | 0.0524     | 0.6300    |



**GS1**

| DPA | Streat | Bio_R1 | Bio_R2 | Bio_R3 |
|-----|--------|--------|--------|--------|
| 7   | S0     | 1.0000 | 1.0000 | 1.0000 |
| 7   | S30    | 0.6552 | 0.6071 | 0.3820 |
| 14  | S0     | 0.9352 | 0.5664 | 0.5697 |
| 14  | S30    | 0.9919 | 0.2379 | 0.7440 |
| 21  | S0     | 0.8655 | 1.4557 | 0.9954 |
| 21  | S30    | 1.1933 | 1.1134 | 1.0151 |

**GS2**

| DPA | Streat | Bio_R1 | Bio_R2 | Bio_R3 |
|-----|--------|--------|--------|--------|
| 7   | S0     | 1.0000 | 1.0000 | 1.0000 |
| 7   | S30    | 0.3622 | 0.7371 | 1.1500 |
| 14  | S0     | 0.2567 | 0.2517 | 0.5064 |
| 14  | S30    | 0.2137 | 0.1688 | 0.1537 |
| 21  | S0     | 0.0846 | 0.2076 | 0.2071 |
| 21  | S30    | 0.0328 | 0.1233 | 0.2720 |

| Vurname     | Streat | Ntreat | glu/gli | $\omega_5\%$ | $\omega_{1,2}\%$ | $\alpha/\beta\%$ | $\gamma\%$ | $\omega\%$ | gliadins% |
|-------------|--------|--------|---------|--------------|------------------|------------------|------------|------------|-----------|
| Spitfire    | S0     | N25    | 0.5442  | 0.0164       | 0.0371           | 0.3450           | 0.2491     | 0.0535     | 0.6476    |
| Spitfire    | S0     | N25    | 0.6495  | 0.0115       | 0.0350           | 0.2970           | 0.2628     | 0.0464     | 0.6062    |
| Spitfire    | S0     | N25    | 0.5897  | 0.0156       | 0.0344           | 0.3298           | 0.2493     | 0.0499     | 0.6290    |
| Wyalkatchem | S0     | N25    | 0.5623  | 0.0120       | 0.0367           | 0.3067           | 0.2847     | 0.0486     | 0.6401    |
| Wyalkatchem | S0     | N25    | 0.5379  | 0.0173       | 0.0291           | 0.2966           | 0.3073     | 0.0464     | 0.6502    |
| Wyalkatchem | S0     | N25    | 0.6442  | 0.0108       | 0.0284           | 0.2875           | 0.2815     | 0.0392     | 0.6082    |
| Spitfire    | S30    | N25    | 0.9867  | 0.0103       | 0.0237           | 0.2519           | 0.2175     | 0.0340     | 0.5033    |
| Spitfire    | S30    | N25    | 1.0477  | 0.0097       | 0.0282           | 0.2660           | 0.1845     | 0.0379     | 0.4883    |
| Spitfire    | S30    | N25    | 1.1634  | 0.0119       | 0.0202           | 0.2288           | 0.2014     | 0.0321     | 0.4622    |
| Wyalkatchem | S30    | N25    | 0.8120  | 0.0086       | 0.0206           | 0.2713           | 0.2514     | 0.0291     | 0.5519    |
| Wyalkatchem | S30    | N25    | 1.3163  | 0.0085       | 0.0185           | 0.2113           | 0.1934     | 0.0270     | 0.4317    |
| Wyalkatchem | S30    | N25    | 1.0416  | 0.0086       | 0.0210           | 0.2195           | 0.2407     | 0.0296     | 0.4898    |
| Spitfire    | S50    | N25    | 1.1081  | 0.0158       | 0.0301           | 0.2420           | 0.1864     | 0.0459     | 0.4744    |
| Spitfire    | S50    | N25    | 1.2100  | 0.0217       | 0.0246           | 0.2156           | 0.1906     | 0.0463     | 0.4525    |
| Spitfire    | S50    | N25    | 1.1533  | 0.0161       | 0.0213           | 0.2282           | 0.1988     | 0.0374     | 0.4644    |
| Wyalkatchem | S50    | N25    | 0.7034  | 0.0192       | 0.0238           | 0.2529           | 0.2912     | 0.0430     | 0.5870    |
| Wyalkatchem | S50    | N25    | 0.6710  | 0.0215       | 0.0290           | 0.2617           | 0.2862     | 0.0506     | 0.5984    |
| Wyalkatchem | S50    | N25    | 0.7600  | 0.0253       | 0.0284           | 0.2415           | 0.2730     | 0.0537     | 0.5682    |
